# Supplementary material
Source: publisher figshare collection journal article supplement (https://asha.figshare.com/ndownloader/files/25329647)
Supplement: Supplementary file 1 [file 25329647]

## Sheet: Sheet1
Supplemental material, Guo et al., “Clausal Density Between Ages 4 and 9 Years for the Edmonton Narrative Norms Instrument: Reference Data and Psychometric Properties,” LSHSS, https://doi.org/10.1044/2020_LSHSS-20-00043
Supplemental Material 2: Excelsheet for computing clausal density score
					Example
	Code	Frequency Count			Code	Frequency Count
	[CD-0]				[CD-0]	1
	[CD-1]				[CD-1]	18
	[CD-2]				[CD-2]	6
	[CD-3]				[CD-3]	4
	[CD-4]				[CD-4]	2
	[CD-5]				[CD-5]
	[CD-6]				[CD-6]	1
	[CD-7]				[CD-7]
	[CD-8]				[CD-8]
	[CD-9]				[CD-9]
	[CD-10]				[CD-10]
	[CD-11]				[CD-11]
	[CD-12]				[CD-12]
	[CD-13]				[CD-13]
	[CD-14]				[CD-14]
	[CD-15]				[CD-15]
	Total # of Clauses	0			Total # of Clauses	56
	Total # of C-units Included	0			Total # of C-units Included	32
	Clausal Density	#DIV/0!			Clausal Density	1.75
